# Supplementary material
Source: publisher figshare collection journal article supplement (https://acs.figshare.com/ndownloader/files/7595206)
Supplement: Supplementary file 1 [file 7595206]

## Sheet: MICH-03-14VW
Supplementary reports (tissue): Report S3: Statistics report
Head and neck squamous cell carcinoma samples
						Fold of Change
Super Pathway	Sub Pathway	Biochemical Name	KEGG	PUBCHEM	HMDB	Group Main Effect	Primar	Metastati	Metastati
							Control	Control	Primary
Amino Acid	Glycine, Serine and Threonine Metabolism	glycine	C00037	750	HMDB00123	1	1.6078	1.6112	1.0021
		N-acetylglycine		10972	HMDB00532	1	1.0645	1.0822	1.0167
		sarcosine (N-Methylglycine)	C00213	1088	HMDB00271	1	1.9621	1.4992	0.7641
		dimethylglycine	C01026	673	HMDB00092	1	1.1271	1.1146	0.989
		betaine	C00719	247	HMDB00043	1	1.5008	1.3781	0.9182
		betaine aldehyde	C00576	249	HMDB01252	1	0.2752	0.2657	0.9657
		serine	C00065	5951	HMDB00187	1	1.5655	1.6635	1.0626
		N-acetylserine		65249	HMDB02931	1	2.0392	1.9028	0.9331
		threonine	C00188	6288	HMDB00167	1	1.9264	1.8826	0.9772
		N-acetylthreonine	C01118	152204		1	2.3684	2.2427	0.9469
	Alanine and Aspartate Metabolism	alanine	C00041	5950	HMDB00161	1	1.3826	1.2384	0.8957
		N-acetylalanine	C02847	88064	HMDB00766	1	2.1561	2.2574	1.047
		aspartate	C00049	5960	HMDB00191	1	2.6932	2.5871	0.9606
		asparagine	C00152	6267	HMDB00168	1	2.2438	2.3267	1.0369
		N-acetylaspartate (NAA)	C01042	65065	HMDB00812	1	3.9737	3.8462	0.9679
	Glutamate Metabolism	glutamate	C00025	611	HMDB00148	1	3.606	3.2857	0.9112
		glutamine	C00064	5961	HMDB00641	1	0.9728	0.8507	0.8746
		N-acetylglutamate	C00624	70914	HMDB01138	1	4.2034	4.1179	0.9797
		N-acetylglutamine	C02716	182230	HMDB06029	1	2.0735	1.5882	0.766
		N-acetyl-aspartyl-glutamate (NAAG)	C12270	5255	HMDB01067	1	0.8803	0.6432	0.7306
		gamma-aminobutyrate (GABA)	C00334	119	HMDB00112	1	1.8606	1.8254	0.981
		glutamate, gamma-methyl ester		68662		1	4.1409	3.5094	0.8475
		pyroglutamine*		134508		1	2.5637	2.3966	0.9348
	Histidine Metabolism	histidine	C00135	6274	HMDB00177	1	1.2726	1.2822	1.0076
		N-acetylhistidine	C02997	75619	HMDB32055	1	3.3219	2.9626	0.8918
		1-methylhistidine	C01152	92105	HMDB00001	1	3.4363	2.5939	0.7549
		3-methylhistidine	C01152	64969	HMDB00479	1	1.745	1.5778	0.9042
		trans-urocanate	C00785	736715	HMDB00301	1	0.5877	0.577	0.9818
		imidazole propionate		70630	HMDB02271	1	2.267	1.2299	0.5425
		imidazole lactate	C05568	440129	HMDB02320	1	3.7934	3.629	0.9567
		histamine	C00388	774	HMDB00870	1	0.9627	0.4371	0.454
		1-methylhistamine	C05127	3614	HMDB00898	1	1.232	1.5462	1.255
		1-methylimidazoleacetate	C05828	75810	HMDB02820	1	0.3066	0.4302	1.4032
	Lysine Metabolism	lysine	C00047	5962	HMDB00182	1	1.5738	1.5966	1.0145
		N2-acetyllysine	C12989	92907	HMDB00446	1	4.7186	4.2946	0.9101
		N6-acetyllysine	C02727	92832	HMDB00206	1	2.1157	1.9749	0.9334
		N-6-trimethyllysine	C03793	440120	HMDB01325	1	1.802	1.7219	0.9555
		2-aminoadipate	C00956	469	HMDB00510	1	0.6145	0.4295	0.6989
		glutarylcarnitine (C5)		71464488	HMDB13130	1	0.4469	0.4351	0.9735
		3-methylglutarylcarnitine (1)		128145	HMDB00552	1	0.4666	0.4727	1.0132
		pipecolate	C00408	849	HMDB00070	1	2.5225	1.7311	0.6863
		cadaverine	C01672	273	HMDB02322	1	0.8285	0.4145	0.5003
		5-aminovalerate	C00431	138	HMDB03355	1	1.3026	0.9564	0.7342
	Phenylalanine and Tyrosine Metabolism	phenylalanine	C00079	6140	HMDB00159	1	1.7455	1.6088	0.9217
		N-acetylphenylalanine	C03519	74839	HMDB00512	1	1.3513	1.4257	1.055
		phenyllactate (PLA)	C05607	3848	HMDB00779	1	3.7438	5.0678	1.3536
		phenylacetylglutamine	C04148	92258	HMDB06344	1	0.625	0.7374	1.1799
		tyrosine	C00082	6057	HMDB00158	1	1.761	1.6468	0.9351
		N-acetyltyrosine		68310	HMDB00866	1	1.7174	1.5734	0.9162
		3-(4-hydroxyphenyl)lactate	C03672	9378	HMDB00755	1	1.605	2.0329	1.2666
		phenol sulfate	C02180	74426	HMDB60015	1	0.5836	0.5759	0.9868
		p-cresol sulfate	C01468	4615423	HMDB11635	1	0.4863	0.7101	1.4601
		3-methoxytyrosine		1670	HMDB01434	1	2.3771	1.7788	0.7483
		3-iodotyrosine	C02515	439744	HMDB00021	1	1	1	1
		3-(4-hydroxyphenyl)propionate	C01744	10394	HMDB02199	1	0.9077	0.2252	0.2481
	Tryptophan Metabolism	tryptophan	C00078	6305	HMDB00929	1	1.379	1.3162	0.9545
		N-acetyltryptophan	C03137	700653	HMDB13713	1	0.8181	0.7873	0.9623
		indolelactate	C02043	92904	HMDB00671	1	1.1532	1.5488	1.3431
		indoleacetate	C00954	802	HMDB00197	1	0.7161	0.6674	0.932
		indolepropionate		3744	HMDB02302	1	0.5635	0.5852	1.0387
		3-indoxyl sulfate		10258	HMDB00682	1	0.5221	0.7396	1.4166
		kynurenine	C00328	161166	HMDB00684	1	7.2627	5.3263	0.7334
		kynurenate	C01717	3845	HMDB00715	1	1.908	1.4579	0.7641
		tryptophan betaine	C09213	442106	HMDB61115	1	1.716	1.8517	1.0791
		C-glycosyltryptophan		10981970		1	2.7334	2.6855	0.9825
	Leucine, Isoleucine and Valine Metabolism	leucine	C00123	6106	HMDB00687	1	1.9195	1.7312	0.9019
		N-acetylleucine	C02710	70912	HMDB11756	1	1.7611	1.7235	0.9787
		4-methyl-2-oxopentanoate	C00233	70	HMDB00695	1	0.2368	0.2863	1.209
		isovalerate	C08262	10430	HMDB00718	1	1.1272	0.7438	0.6599
		isovalerylcarnitine		6426851	HMDB00688	1	0.8406	0.7507	0.8931
		beta-hydroxyisovalerate		69362	HMDB00754	1	0.731	0.7372	1.0085
		beta-hydroxyisovaleroylcarnitine				1	0.9951	0.6544	0.6577
		alpha-hydroxyisovaleroyl carnitine*				1	0.6062	0.479	0.7902
		alpha-hydroxyisovalerate		99823	HMDB00407	1	1.1649	0.9978	0.8565
		isoleucine	C00407	6306	HMDB00172	1	2.1585	1.9066	0.8833
		3-methyl-2-oxovalerate	C00671	47	HMDB03736	1	0.1585	0.1781	1.1234
		2-methylbutyrylcarnitine (C5)		6426901	HMDB00378	1	1.0627	1.0631	1.0004
		tiglyl carnitine		22833596	HMDB02366	1	0.601	0.4235	0.7047
		2-hydroxy-3-methylvalerate		164623	HMDB00317	1	1.5563	0.8886	0.571
		3-hydroxy-2-ethylpropionate		188979	HMDB00396	1	0.8401	0.985	1.1724
		ethylmalonate		11756	HMDB00622	1	1.1293	0.8439	0.7473
		valine	C00183	6287	HMDB00883	1	1.9312	1.7282	0.8949
		N-acetylvaline		66789	HMDB11757	1	2.1824	2.1803	0.999
		3-methyl-2-oxobutyrate	C00141	49	HMDB00019	1	0.2214	0.2681	1.2109
		isobutyrylcarnitine		168379	HMDB00736	1	0.8687	0.8495	0.9779
		3-hydroxyisobutyrate	C06001	87	HMDB00336	1	0.6016	0.5775	0.96
		alpha-hydroxyisocaproate	C03264	83697	HMDB00746	1	1.4765	0.7354	0.4981
	Methionine, Cysteine, SAM and Taurine Metabolism	methionine	C00073	6137	HMDB00696	1	1.9339	2.0022	1.0353
		N-acetylmethionine	C02712	448580	HMDB11745	1	3.2231	3.1373	0.9734
		N-formylmethionine	C03145	439750	HMDB01015	1	1.7872	1.4398	0.8056
		methionine sulfone		69961		1	1.5116	1.3259	0.8771
		methionine sulfoxide	C02989	158980	HMDB02005	1	1.7328	1.8371	1.0602
		N-acetylmethionine sulfoxide		193368		1	2.7742	2.497	0.9001
		S-adenosylmethionine (SAM)	C00019	34755	HMDB01185	1	9.5134	7.6516	0.8043
		S-adenosylhomocysteine (SAH)	C00021	439155	HMDB00939	1	3.7054	2.4374	0.6578
		cystathionine	C02291	439258	HMDB00099	1	6.8802	7.823	1.137
		2-aminobutyrate	C02261	439691	HMDB00650	1	1.9365	1.4194	0.733
		2-hydroxybutyrate (AHB)	C05984	440864	HMDB00008	1	1.1951	0.9191	0.7691
		cysteine	C00097	5862	HMDB00574	1	6.8249	3.4005	0.4983
		N-acetylcysteine	C06809	12035	HMDB01890	1	3.6471	2.9905	0.82
		cystine	C00491	67678	HMDB00192	1	1.217	0.8517	0.6998
		S-methylcysteine		24417	HMDB02108	1	2.0719	1.6938	0.8175
		cysteine sulfinic acid	C00606	109	HMDB00996	1	2.7527	2.8077	1.02
		hypotaurine	C00519	107812	HMDB00965	1	1.9939	1.7848	0.8951
		taurine	C00245	1123	HMDB00251	1	1.1976	1.0675	0.8914
		N-acetyltaurine		159864		1	1.5593	1.4299	0.9171
	Urea cycle; Arginine and Proline Metabolism	arginine	C00062	232	HMDB00517	1	1.643	1.6786	1.0217
		urea	C00086	1176	HMDB00294	1	0.718	0.8161	1.1365
		ornithine	C00077	6262	HMDB03374	1	1.5651	1.7368	1.1097
		proline	C00148	145742	HMDB00162	1	1.8569	1.6827	0.9061
		citrulline	C00327	9750	HMDB00904	1	0.7408	0.6987	0.9431
		argininosuccinate	C03406	16950;828	HMDB00052	1	0.7354	1.0683	1.4527
		homocitrulline	C02427	65072	HMDB00679	1	1.4175	1.2112	0.8545
		dimethylarginine (SDMA + ADMA)	C03626	123831	HMDB01539	1	2.5136	2.8724	1.1427
		N-delta-acetylornithine		9920500		1	2.1284	1.7361	0.8157
		N-methylproline		557		1	1.0118	0.955	0.9438
		trans-4-hydroxyproline	C01157	5810	HMDB00725	1	2.6956	2.2109	0.8202
		pro-hydroxy-pro		11673055	HMDB06695	1	4.2663	2.9088	0.6818
	Creatine Metabolism	creatine	C00300	586	HMDB00064	1	0.9259	0.7577	0.8184
		creatinine	C00791	588	HMDB00562	1	0.9421	0.8978	0.953
		creatine phosphate	C02305	587	HMDB01511	1	0.2247	0.249	1.1084
		guanidinoacetate	C00581	763	HMDB00128	1	0.8047	0.8295	1.0308
	Polyamine Metabolism	acisoga		129397		1	0.9475	0.9386	0.9906
		putrescine	C00134	1045	HMDB01414	1	6.8269	5.5551	0.8137
		spermine	C00750	1103	HMDB01256	1	0.9662	1.3999	1.4489
		spermidine	C00315	1102	HMDB01257	1	1.828	1.945	1.064
		5-methylthioadenosine (MTA)	C00170	439176	HMDB01173	1	8.2535	6.9633	0.8437
		N(1)-acetylspermine	C02567	916	HMDB01186	1	9.7405	15.3873	1.5797
		N-acetylputrescine	C02714	122356	HMDB02064	1	6.2065	5.3711	0.8654
	Guanidino and Acetamido Metabolism	4-guanidinobutanoate	C01035	500	HMDB03464	1	0.9029	0.8133	0.9008
	Glutathione Metabolism	glutathione, reduced (GSH)	C00051	124886	HMDB00125	1	5.2059	4.6062	0.8848
		glutathione, oxidized (GSSG)	C00127	65359	HMDB03337	1	2.0222	4.1552	2.0548
		cysteine-glutathione disulfide		4247235	HMDB00656	1	1.4868	1.6785	1.1289
		S-methylglutathione	C11347	3605667		1	2.1142	1.9039	0.9005
		S-lactoylglutathione	C03451	440018	HMDB01066	1	4.6047	5.5797	1.2117
		cysteinylglycine	C01419	439498	HMDB00078	1	3.1519	1.666	0.5286
		5-oxoproline	C01879	7405	HMDB00267	1	1.3561	1.3545	0.9988
		ophthalmate		7018721	HMDB05765	1	1.4825	1.2436	0.8388
		norophthalmate*		5489007	HMDB05766	1	2.6261	2.9921	1.1394
Peptide	Gamma-glutamyl Amino Acid	gamma-glutamylalanine		440103	HMDB29142	1	1.4738	1.3511	0.9168
		gamma-glutamylcysteine	C00669	842	HMDB01049	1	2.6827	1.5167	0.5654
		gamma-glutamylglutamate	C05282	92865	HMDB11737	1	2.7947	2.6279	0.9403
		gamma-glutamylglutamine	C05283	150914	HMDB11738	1	1.0964	0.9108	0.8307
		gamma-glutamylisoleucine*		14253342	HMDB11170	1	6.5165	4.9861	0.7651
		gamma-glutamylleucine		151023	HMDB11171	1	3.1158	2.6745	0.8584
		gamma-glutamylmethionine		7009567	HMDB29155	1	3.7065	3.7226	1.0044
		gamma-glutamylphenylalanine		111299	HMDB00594	1	3.4766	3.0895	0.8886
		gamma-glutamylthreonine*			HMDB29159	1	4.0946	3.431	0.8379
		gamma-glutamyltyrosine		94340	HMDB11741	1	2.983	2.8578	0.9581
		gamma-glutamylvaline		7015683	HMDB11172	1	3.6128	3.0123	0.8338
	Dipeptide Derivative	carnosine	C00386	439224	HMDB00033	1	0.1691	0.0551	0.3256
		N-acetylcarnosine		9903482	HMDB12881	1	0.2415	0.1847	0.7648
		anserine	C01262	112072	HMDB00194	1	0.2213	0.103	0.4653
	Dipeptide	alanylleucine		259583	HMDB28691	1	7.0715	4.917	0.6953
		cyclo(pro-val)		98951		1	0.8635	0.962	1.114
		glutamine-leucine				1	4.77	2.3836	0.4997
		glycylisoleucine		88079	HMDB28844	1	7.4636	5.2144	0.6986
		glycylleucine	C02155	92843	HMDB00759	1	6.7537	5.6367	0.8346
		glycylvaline		97417	HMDB28854	1	4.9712	3.4393	0.6918
		isoleucylglycine		342532		1	6.1165	4.439	0.7257
		leucylglycine		79070		1	3.516	2.4506	0.697
		lysylleucine		4682588		1	6.8217	3.2268	0.473
		phenylalanylalanine		6993123;5488196		1	6.4951	4.2529	0.6548
		phenylalanylglycine		98207		1	4.2459	3.3641	0.7923
		prolylglycine		7408076;6426709		1	3.4878	4.0568	1.1631
		threonylphenylalanine		4099799;4099798		1	2.5483	1.4534	0.5703
		tryptophylglycine		263471		1	1.5451	1.3365	0.865
		valylglutamine		5253209		1	6.9967	4.7557	0.6797
		valylglycine		136487		1	8.1121	5.3378	0.658
		valylleucine		352039		1	7.487	4.7192	0.6303
		leucylglutamine*		4305457		1	4.8843	3.3828	0.6926
	Polypeptide	Ac-Ser-Asp-Lys-Pro-OH		4409396		1	10.1348	8.9108	0.8792
Carbohydrate	Glycolysis, Gluconeogenesis, and Pyruvate Metabolism	1,5-anhydroglucitol (1,5-AG)	C07326	64960	HMDB02712	1	0.8748	0.9701	1.1089
		glucose	C00031	79025	HMDB00122	1	0.3648	0.4661	1.2779
		glucose 6-phosphate	C00668	5958	HMDB01401	1	1.932	1.9548	1.0118
		fructose-6-phosphate	C05345	69507	HMDB00124	1	1.5965	1.8806	1.178
		Isobar: fructose 1,6-diphosphate, glucose 1,6-diphosphate, myo-inositol 1,4 or 1,3-diphosphate				1	1.1972	1.0847	0.9061
		dihydroxyacetone phosphate (DHAP)	C00111	668	HMDB01473	1	0.7463	0.7831	1.0493
		2-phosphoglycerate	C00631	59	HMDB03391	1	0.3609	0.3761	1.042
		3-phosphoglycerate	C00597	724	HMDB00807	1	0.3022	0.2444	0.8087
		phosphoenolpyruvate (PEP)	C00074	1005	HMDB00263	1	0.4007	0.3238	0.808
		pyruvate	C00022	1060	HMDB00243	1	3.228	2.6545	0.8223
		lactate	C00186	612	HMDB00190	1	1.3074	1.248	0.9546
		glycerate	C00258	752	HMDB00139	1	1.0924	1.3601	1.2451
	Pentose Phosphate Pathway	6-phosphogluconate	C00345	91493	HMDB01316	1	1.5012	1.4862	0.99
		ribose 5-phosphate	C00117		HMDB01548	1	1.0295	0.7906	0.768
		ribose 1-phosphate	C00620	439236	HMDB01489	1	1.2887	1.1927	0.9256
		sedoheptulose-7-phosphate	C05382	616	HMDB01068	1	1.972	2.2321	1.1319
		ribulose/xylulose 5-phosphate	C00199			1	0.8432	0.697	0.8267
	Pentose Metabolism	ribulose	C00309	151261	HMDB00621	1	1.4543	1.4773	1.0158
		ribose	C00121	5779	HMDB00283	1	1.46	1.5372	1.0529
		ribitol	C00474	6912	HMDB00508	1	4.002	3.3234	0.8304
		ribonate	C01685	5460677	HMDB00867	1	2.3838	2.0096	0.843
		xylulose	C00310	5289590	HMDB00654	1	1.0347	1.1581	1.1193
		xylonate	C05411	6602431	HMDB60256	1	1.628	1.5778	0.9692
		xylose	C00181	135191	HMDB00098	1	1.1145	0.9157	0.8216
		xylitol	C00379	6912	HMDB02917	1	2.8008	2.7403	0.9784
		arabinose	C00216	66308	HMDB00646	1	1.5099	1.4074	0.9321
		threitol	C16884	169019	HMDB04136	1	0.8736	1.2091	1.384
		arabitol	C01904	94154	HMDB00568	1	1.4644	1.7879	1.2209
		fucose	C01018	19466	HMDB00174	1	1.731	1.5979	0.9231
	Glycogen Metabolism	maltohexaose	C01936	439606	HMDB12253	1	0.2553	0.2545	0.997
		maltopentaose	C06218	13489094	HMDB12254	1	0.3415	0.6263	1.834
		maltotetraose	C02052	446495	HMDB01296	1	0.6021	0.4825	0.8013
		maltotriose	C01835	439586	HMDB01262	1	0.2372	0.1928	0.8126
		maltose	C00208	10991489	HMDB00163	1	0.2508	0.2556	1.0193
	Fructose, Mannose and Galactose Metabolism	fructose	C00095	5984	HMDB00660	1	0.8801	0.9003	1.0229
		fructose 1-phosphate	C01094	65246	HMDB01076	1	1.5026	2.2485	1.4964
		sorbitol	C00794	5780	HMDB00247	1	1.4688	0.9142	0.6224
		mannose	C00159	18950	HMDB00169	1	0.7355	0.7863	1.069
		mannose-6-phosphate	C00275	439198	HMDB01078	1	2.0154	1.9474	0.9663
		mannitol	C00392	6251	HMDB00765	1	0.7329	0.4945	0.6748
		galactose 1-phosphate	C00446	123912	HMDB00645	1	3.0728	2.1741	0.7075
		galactonate	C00880	128869	HMDB00565	1	9.0878	8.8576	0.9747
	Nucleotide Sugar	UDP-glucose	C00029	8629	HMDB00286	1	3.2517	1.908	0.5868
		UDP-galactose	C00052	18068	HMDB00302	1	3.1134	2.0549	0.66
		UDP-glucuronate	C00167	17473	HMDB00935	1	4.8856	5.8331	1.1939
		guanosine 5'-diphospho-fucose				1	1.6611	1.7769	1.0697
		UDP-N-acetylglucosamine	C00043	445675	HMDB00290	1	7.9581	6.6574	0.8365
		cytidine 5'-monophospho-N-acetylneuraminic acid	C00128	448209	HMDB01176	1	1.1965	1.0481	0.8759
		glucuronate 1-phosphate*	C04037,C01195,C05385		HMDB03976	1	1.6411	1.3523	0.824
	Aminosugar Metabolism	glucosamine-6-phosphate	C00352	439217	HMDB01254	1	2.155	2.4175	1.1218
		glucuronate	C00191	444791	HMDB00127	1	1.6415	1.9438	1.1842
		N-acetylglucosamine	C00140	24139	HMDB00215	1	4.1959	6.0706	1.4468
		N-acetylglucosamine 6-phosphate	C00357	439219	HMDB02817	1	3.4635	3.4571	0.9981
		N-acetyl-glucosamine 1-phosphate	C04256	440364	HMDB01367	1	3.3562	3.4376	1.0243
		N-acetylgalactosamine	C01074	35717	HMDB00212	1	3.0857	4.2952	1.392
		N-acetylmannosamine	C00140	439281	HMDB01129	1	3.5177	5.6957	1.6191
		N-acetylneuraminate	C00270	439197	HMDB00230	1	0.8558	0.7917	0.9251
		erythronate*		2781043	HMDB00613	1	2.1382	2.0492	0.9584
Energy	TCA Cycle	citrate	C00158	311	HMDB00094	1	0.4216	0.4367	1.0359
		isocitrate	C00311	1198	HMDB00193	1	5.8896	4.7539	0.8072
		alpha-ketoglutarate	C00026	51	HMDB00208	1	1.1277	1.2149	1.0773
		succinylcarnitine				1	0.4703	0.3147	0.6692
		succinate	C00042	1110	HMDB00254	1	1.2431	0.4992	0.4016
		fumarate	C00122	444972	HMDB00134	1	0.9979	0.9847	0.9868
		malate	C00149	525	HMDB00156	1	0.6784	0.7495	1.1048
		2-methylcitrate	C02225	439681	HMDB00379	1	1.9372	2.0628	1.0648
	Oxidative Phosphorylation	acetylphosphate	C00227	186	HMDB01494	1	0.3813	0.3308	0.8676
		phosphate	C00009	1061	HMDB01429	1	1.6059	1.6684	1.0389
Lipid	Short Chain Fatty Acid	valerate	C00803	7991	HMDB00892	1	0.9058	0.7925	0.8749
	Medium Chain Fatty Acid	caproate (6:0)	C01585	8892	HMDB00535	1	0.9218	0.7708	0.8362
		heptanoate (7:0)	C17714	8094	HMDB00666	1	0.9401	0.8748	0.9305
		caprylate (8:0)	C06423	379	HMDB00482	1	1.1275	1.6471	1.4609
		caprate (10:0)	C01571	2969	HMDB00511	1	1.0666	1.5123	1.4178
		5-dodecenoate (12:1n7)		5312378	HMDB00529	1	1.8522	2.2858	1.2341
	Long Chain Fatty Acid	myristate (14:0)	C06424	11005	HMDB00806	1	1.5332	1.851	1.2073
		myristoleate (14:1n5)	C08322	5281119	HMDB02000	1	1.6358	2.1245	1.2988
		pentadecanoate (15:0)	C16537	13849	HMDB00826	1	1.0201	1.0834	1.062
		palmitate (16:0)	C00249	985	HMDB00220	1	1.2976	1.3934	1.0738
		palmitoleate (16:1n7)	C08362	445638	HMDB03229	1	1.8516	2.0808	1.1238
		margarate (17:0)		10465	HMDB02259	1	1.3701	1.4642	1.0687
		10-heptadecenoate (17:1n7)		5312435	HMDB60038	1	1.5481	1.6005	1.0338
		stearate (18:0)	C01530	5281	HMDB00827	1	1.4253	1.4975	1.0506
		oleate (18:1n9)	C00712	445639	HMDB00207	1	1.755	2.2999	1.3105
		cis-vaccenate (18:1n7)	C08367	5282761	HMDB03231	1	2.887	3.1281	1.0835
		nonadecanoate (19:0)	C16535	12591	HMDB00772	1	1.4824	1.6769	1.1312
		10-nonadecenoate (19:1n9)		5312513	HMDB13622	1	2.4913	2.5643	1.0293
		arachidate (20:0)	C06425	10467	HMDB02212	1	1.6879	2.0602	1.2205
		eicosenoate (20:1)		5282768	HMDB02231	1	3.5555	3.8367	1.0791
		erucate (22:1n9)	C08316	5281116	HMDB02068	1	4.6624	5.2396	1.1238
	Polyunsaturated Fatty Acid (n3 and n6)	stearidonate (18:4n3)	C16300	5312508	HMDB06547	1	1.2614	1.6796	1.3315
		eicosapentaenoate (EPA; 20:5n3)	C06428	446284	HMDB01999	1	1.5771	1.8514	1.1739
		docosapentaenoate (n3 DPA; 22:5n3)	C16513	6441454	HMDB01976	1	2.7228	2.8311	1.0398
		docosahexaenoate (DHA; 22:6n3)	C06429	445580	HMDB02183	1	2.006	1.9605	0.9773
		docosatrienoate (22:3n3)	C16534	5312556	HMDB02823	1	7.1281	8.7623	1.2293
		linoleate (18:2n6)	C01595	5280450	HMDB00673	1	1.1145	1.2254	1.0995
		linolenate [alpha or gamma; (18:3n3 or 6)]	C06426	5280934	HMDB03073	1	1.3327	1.607	1.2058
		dihomo-linolenate (20:3n3 or n6)	C03242	5280581	HMDB02925	1	2.5363	2.6596	1.0486
		arachidonate (20:4n6)	C00219	444899	HMDB01043	1	1.8307	1.7488	0.9552
		adrenate (22:4n6)	C16527	5497181	HMDB02226	1	5.1233	5.3674	1.0477
		docosapentaenoate (n6 DPA; 22:5n6)	C16513	6441454	HMDB01976	1	3.6393	3.3526	0.9212
		docosadienoate (22:2n6)	C16533	5282807	HMDB61714	1	5.765	6.6687	1.1568
		dihomo-linoleate (20:2n6)	C16525	6439848	HMDB05060	1	3.6756	3.928	1.0687
	Fatty Acid, Branched	15-methylpalmitate (isobar with 2-methylpalmitate)		17903417		1	1.5814	1.5815	1.0001
		17-methylstearate		3083779		1	2.2873	2.4432	1.0682
	Fatty Acid, Dicarboxylate	2-hydroxyglutarate	C02630	43	HMDB00606	1	1.4808	1.2748	0.8609
		azelate (nonanedioate)	C08261	2266	HMDB00784	1	0.6829	0.5432	0.7954
		sebacate (decanedioate)	C08277	5192	HMDB00792	1	0.8772	0.931	1.0613
		dodecanedioate	C02678	12736	HMDB00623	1	0.6904	0.8082	1.1707
		3-carboxy-4-methyl-5-propyl-2-furanpropanoate (CMPF)		123979	HMDB61112	1	0.4805	0.596	1.2402
	Fatty Acid, Amino	2-aminoheptanoate		227939		1	8.0208	5.681	0.7083
		2-aminooctanoate		69522	HMDB00991	1	2.4838	1.4623	0.5887
	Fatty Acid Synthesis	malonylcarnitine		22833583	HMDB02095	1	0.5103	0.2876	0.5636
	Fatty Acid Metabolism (also BCAA Metabolism)	butyrylcarnitine	C02862	439829	HMDB02013	1	1.6065	0.9123	0.5679
		propionylcarnitine	C03017	107738	HMDB00824	1	0.6613	0.5005	0.7568
		methylmalonate (MMA)	C02170	487	HMDB00202	1	0.7597	0.4824	0.635
	Fatty Acid Metabolism(Acyl Glycine)	hexanoylglycine		99463	HMDB00701	1	0.7342	0.6032	0.8216
		N-palmitoyl glycine		151008		1	0.9255	0.9163	0.9901
	Fatty Acid Metabolism(Acyl Carnitine)	acetylcarnitine	C02571	1	HMDB00201	1	0.7628	0.6274	0.8225
		hydroxybutyrylcarnitine*		53481617	HMDB13127	1	0.7666	0.4824	0.6292
		valerylcarnitine		6426903	HMDB13128	1	0.5803	0.3925	0.6765
		hexanoylcarnitine		6426853	HMDB00705	1	0.7235	0.5459	0.7545
		octanoylcarnitine	C02838	123701	HMDB00791	1	0.4543	0.4653	1.0243
		decanoylcarnitine		10245190	HMDB00651	1	0.5764	0.6819	1.183
		laurylcarnitine		10427569	HMDB02250	1	1.5326	1.7048	1.1124
		myristoylcarnitine		53477791	HMDB05066	1	2.0639	1.6367	0.793
		palmitoylcarnitine	C02990	461	HMDB00222	1	2.3807	1.7885	0.7513
		stearoylcarnitine		6426855	HMDB00848	1	3.696	2.6019	0.704
		linoleoylcarnitine*		6450015	HMDB06469	1	0.9027	0.553	0.6126
		oleoylcarnitine		6441392;53477789	HMDB05065	1	1.8432	1.1594	0.629
		myristoleoylcarnitine*				1	1.1536	1.0971	0.9511
	Carnitine Metabolism	deoxycarnitine	C01181	134	HMDB01161	1	1.4039	1.1984	0.8536
		carnitine	C00318	10917	HMDB00062	1	1.0352	0.9039	0.8731
	Ketone Bodies	3-hydroxybutyrate (BHBA)	C01089	441	HMDB00357	1	1.1615	0.8122	0.6992
	Fatty Acid, Monohydroxy	4-hydroxybutyrate (GHB)	C00989	10413	HMDB00710	1	1.711	1.2688	0.7416
		2-hydroxyoctanoate		94180	HMDB02264	1	0.7834	0.7453	0.9513
		2-hydroxypalmitate		92836	HMDB31057	1	1.2993	1.4072	1.083
		3-hydroxyoctanoate		26613	HMDB01954	1	1.1544	1.4086	1.2201
		3-hydroxydecanoate		26612	HMDB02203	1	1.1391	1.7454	1.5323
		3-hydroxylaurate		94216	HMDB00387	1	1.3782	2.1087	1.5301
		5-hydroxyhexanoate		170748	HMDB00525	1	0.8118	0.8955	1.1032
		13-HODE + 9-HODE		43013		1	0.5447	0.5185	0.9519
	Eicosanoid	prostaglandin E2	C00584	5280360	HMDB01220	1	1.3359	1.2133	0.9082
		prostaglandin F2alpha	C00639	5280363	HMDB01139	1	1.626	1.7258	1.0614
		6-keto prostaglandin F1alpha	C05961	5280888	HMDB02886	1	1.4107	1.4408	1.0214
	Endocannabinoid	oleic ethanolamide		5283454	HMDB02088	1	4.9617	4.0771	0.8217
		palmitoyl ethanolamide	C16512	4671	HMDB02100	1	3.7138	3.2907	0.8861
		N-oleoyltaurine		6437033		1	1.2426	0.856	0.6889
		N-stearoyltaurine		168274		1	1.5938	1.5261	0.9576
		N-palmitoyltaurine				1	0.819	0.8434	1.0298
	Inositol Metabolism	myo-inositol	C00137	892	HMDB00211	1	1.224	1.2875	1.0519
		chiro-inositol	C19891		HMDB34220	1	0.9257	1.3775	1.4881
		scyllo-inositol	C06153	892	HMDB06088	1	1.6664	1.9158	1.1496
		inositol 1-phosphate (I1P)	C04006	440194	HMDB00213	1	1.7788	1.8293	1.0284
	Phospholipid Metabolism	choline	C00114	305	HMDB00097	1	1.2087	1.3421	1.1103
		choline phosphate	C00588	1014	HMDB01565	1	1.6502	1.5435	0.9353
		cytidine 5'-diphosphocholine	C00307	13804	HMDB01413	1	8.9984	9.4349	1.0485
		glycerophosphorylcholine (GPC)	C00670	71920	HMDB00086	1	1.5398	1.1437	0.7427
		ethanolamine	C00189	700	HMDB00149	1	4.6584	6.4023	1.3743
		phosphoethanolamine	C00346	1015	HMDB00224	1	1.9065	1.7986	0.9434
		cytidine-5'-diphosphoethanolamine	C00570	123727	HMDB01564	1	2.9641	3.5723	1.2052
		glycerophosphoethanolamine	C01233	123874	HMDB00114	1	2.1761	1.7399	0.7995
		glycerophosphoinositol*				1	4.7337	4.3722	0.9236
		1-stearoyl-2-arachidonoyl-GPC (18:0/20:4)		16219824		1	1.1433	1.2168	1.0643
		1,2-dipalmitoyl-GPC (16:0/16:0)		452110	HMDB00564	1	1.7897	1.9283	1.0774
		1-stearoyl-2-oleoyl-GPC (18:0/18:1)				1	1.4312	1.533	1.0712
		1-palmitoyl-2-arachidonoyl-GPC (16:0/20:4)		10747814		1	0.8651	0.8507	0.9834
		1-palmitoyl-2-palmitoleoyl-GPC (16:0/16:1)*				1	2.2897	2.2929	1.0014
		1-stearoyl-2-arachidonoyl-GPI (18:0/20:4)				1	1.0857	1.2168	1.1208
		1-palmitoyl-2-arachidonoyl-GPI (16:0/20:4)*				1	1.0436	1.0741	1.0293
		1-(1-enyl-stearoyl)-2-arachidonoyl-GPE (P-18:0/20:4)*				1	0.9907	1.0406	1.0504
		1-stearoyl-2-arachidonoyl-GPE (18:0/20:4)		5289133		1	1.2666	1.3489	1.065
		1-stearoyl-2-oleoyl-GPE (18:0/18:1)				1	2.4596	2.9208	1.1875
		1-(1-enyl-palmitoyl)-GPC (P-16:0)*		10917802		1	1.0977	0.8422	0.7673
		1-palmitoyl-2-arachidonoyl-GPE (16:0/20:4)*				1	1.1886	1.1735	0.9873
	Lysolipid	1-palmitoyl-GPC (16:0)		86554	HMDB10382	1	1.3002	0.6564	0.5048
		2-palmitoyl-GPC (16:0)*		15061532	HMDB61702	1	2.3105	1.2389	0.5362
		1-palmitoleoyl-GPC (16:1)*		24779461	HMDB10383	1	3.9374	3.1275	0.7943
		2-palmitoleoyl-GPC (16:1)*				1	3.0123	2.1358	0.709
		1-stearoyl-GPC (18:0)		497299	HMDB10384	1	1.4922	0.7991	0.5356
		1-oleoyl-GPC (18:1)		16081932	HMDB02815	1	2.5251	1.428	0.5655
		1-linoleoyl-GPC (18:2)	C04100	11988421	HMDB10386	1	1.6128	1.036	0.6424
		1-arachidonoyl-GPC (20:4)*	C05208		HMDB10395	1	2.4412	1.7806	0.7294
		1-(1-enyl-palmitoyl)-GPE (P-16:0)*				1	1.7236	1.3792	0.8002
		1-(1-enyl-stearoyl)-GPE (P-18:0)*				1	1.2288	1.1171	0.9091
		1-(1-enyl-oleoyl)-GPE (P-18:1)*				1	1.2247	0.9066	0.7402
		1-palmitoyl-GPE (16:0)		9547069	HMDB11503	1	0.8807	0.7375	0.8374
		1-stearoyl-GPE (18:0)		9547068	HMDB11130	1	0.7133	0.6782	0.9508
		2-stearoyl-GPE (18:0)*				1	0.7254	0.6706	0.9244
		1-oleoyl-GPE (18:1)		9547071	HMDB11506	1	1.1807	0.9155	0.7754
		1-linoleoyl-GPE (18:2)*		52925130	HMDB11507	1	1.2178	0.9978	0.8194
		1-arachidonoyl-GPE (20:4)*		42607465	HMDB11517	1	1.4066	1.3142	0.9343
		1-palmitoyl-GPI (16:0)*			HMDB61695	1	2.8809	2.2869	0.7938
		1-stearoyl-GPI (18:0)			HMDB61696	1	2.7932	2.522	0.9029
		1-oleoyl-GPI (18:1)*				1	3.0404	2.62	0.8617
		1-linoleoyl-GPI (18:2)*				1	2.0867	1.8191	0.8718
		1-arachidonoyl-GPI (20:4)*			HMDB61690	1	2.7235	2.5233	0.9265
		1-stearoyl-GPS (18:0)*		9547101		1	2.0769	1.8793	0.9049
		1-oleoyl-GPS (18:1)		9547099		1	4.3383	3.5368	0.8153
		1-linoleoylglycerophosphoserine*				1	5.8443	4.8107	0.8232
		1-palmitoyl-GPG (16:0)*		3300276		1	1.502	1.0166	0.6768
		1-palmitoyl-GPS (16:0)*		9547100		1	1.7495	1.2246	0.7
		1-stearoyl-GPG (18:0)				1	1.6604	1.3456	0.8104
		1-oleoyl-GPG (18:1)*				1	1.9304	1.7432	0.903
	Phosphatidylcholine (PC)	oleoyl-linoleoyl-glycerophosphocholine (1)				1	0.8693	0.8568	0.9856
		oleoyl-linoleoyl-glycerophosphocholine (2)				1	0.8609	0.8456	0.9822
	Phosphatidylinositol (PI)	oleoyl-linoleoyl-glycerophosphoinositol (1)				1	1.1573	1.1118	0.9607
	Glycerolipid Metabolism	glycerol	C00116	753	HMDB00131	1	1.3807	1.512	1.0951
		glycerol 3-phosphate	C00093	754	HMDB00126	1	0.2212	0.1378	0.6229
		glycerophosphoglycerol	C03274	439964		1	3.9096	3.6163	0.925
	Monoacylglycerol	1-myristoylglycerol (14:0)	C01885	79050	HMDB11561	1	2.0793	2.7032	1.3001
		1-palmitoylglycerol (16:0)		14900	HMDB31074	1	2.6332	3.2018	1.2159
		2-palmitoylglycerol (16:0)		123409	HMDB11533	1	4.1213	4.6089	1.1183
		1-stearoylglycerol (18:0)	D01947	24699	HMDB31075	1	2.29	2.636	1.1511
		1-oleoylglycerol (18:1)		5283468	HMDB11567	1	2.6424	2.1435	0.8112
		2-oleoylglycerol (18:1)		5319879		1	5.0468	4.7484	0.9409
		1-linoleoylglycerol (18:2)		5283469		1	3.0629	3.1025	1.013
		2-linoleoylglycerol (18:2)		5365676	HMDB11538	1	3.1241	2.6964	0.8631
		1-arachidonylglycerol (20:4)	C13857	5282281	HMDB11572	1	4.6381	4.0325	0.8694
		2-arachidonoylglycerol (20:4)	C13856	5282280	HMDB04666	1	3.8033	2.6696	0.7019
		1-docosahexaenoylglycerol (22:6)			HMDB11587	1	5.8577	5.8349	0.9961
		1-dihomo-linolenylglycerol (alpha, gamma)				1	4.4731	4.0161	0.8978
		1-palmitoleoylglycerol (16:1)*				1	4.6835	4.3521	0.9292
		2-palmitoleoylglycerol (16:1)*				1	2.2193	1.7046	0.7681
	Sphingolipid Metabolism	sphinganine	C00836	3126	HMDB00269	1	1.2846	1.2208	0.9503
		palmitoyl sphingomyelin (d18:1/16:0)		9939941		1	1.2074	1.2079	1.0004
		stearoyl sphingomyelin (d18:1/18:0)	C00550	6453725	HMDB01348	1	0.3271	0.2859	0.8741
		sphingosine	C00319	5353955	HMDB00252	1	3.5555	2.4028	0.6758
		N-palmitoyl-sphingosine (d18:1/16:0)		5283564	HMDB04949	1	1.3364	1.5056	1.1267
		sphingomyelin (d18:1/14:0, d16:1/16:0)*		11433862		1	1.0245	0.9744	0.9511
		sphingomyelin (d18:2/16:0, d18:1/16:1)*				1	1.1566	1.3108	1.1333
	Mevalonate Metabolism	3-hydroxy-3-methylglutarate	C03761	1662	HMDB00355	1	2.8894	2.5357	0.8776
	Sterol	cholesterol	C00187	11025495	HMDB00067	1	1.5608	1.6695	1.0696
		7-alpha-hydroxy-3-oxo-4-cholestenoate (7-Hoca)	C17337	3081085	HMDB12458	1	0.8411	0.834	0.9916
	Steroid	pregnen-diol disulfate*				1	0.5052	0.5911	1.17
		pregn steroid monosulfate*				1	0.5847	0.4587	0.7844
		cortisol	C00735	5754	HMDB00063	1	0.6837	0.6454	0.9439
		cortisone	C00762	222786	HMDB02802	1	1.4168	1.4206	1.0027
		dehydroisoandrosterone sulfate (DHEA-S)	C04555	12594	HMDB01032	1	0.4874	0.476	0.9767
		16a-hydroxy DHEA 3-sulfate				1	0.3435	0.3569	1.039
		epiandrosterone sulfate	C07635		HMDB00365	1	0.4534	0.4652	1.026
		androsterone sulfate		159663	HMDB02759	1	0.4421	0.4856	1.0985
		4-androsten-3beta,17beta-diol monosulfate (1)			HMDB03818	1	0.6119	0.5015	0.8196
		4-androsten-3beta,17beta-diol disulfate (1)	C04295	10634	HMDB03818	1	0.5102	0.5428	1.0639
		4-androsten-3beta,17beta-diol disulfate (2)	C04295	10634	HMDB03818	1	0.3828	0.4621	1.2072
	Primary Bile Acid Metabolism	cholate	C00695	221493	HMDB00619	1	0.8618	1.0468	1.2148
		glycocholate	C01921	10140	HMDB00138	1	0.7997	1.0119	1.2653
		taurocholate	C05122	6675	HMDB00036	1	0.7563	0.7536	0.9964
		glycochenodeoxycholate	C05466	12544	HMDB00637	1	0.4825	0.6509	1.349
		taurochenodeoxycholate	C05465	387316	HMDB00951	1	0.7492	0.8357	1.1155
	Secondary Bile Acid Metabolism	deoxycholate	C04483	222528	HMDB00626	1	0.726	0.9569	1.318
		glycodeoxycholate	C05464	3035026	HMDB00631	1	0.935	1.8302	1.9574
		glycolithocholate sulfate*	C11301	72222	HMDB02639	1	0.5215	0.589	1.1295
		taurolithocholate 3-sulfate	C03642	440071	HMDB02580	1	0.6889	0.7442	1.0804
		glycoursodeoxycholate		12310288	HMDB00708	1	0.8183	0.8553	1.0452
		glycocholenate sulfate*				1	0.4659	0.4476	0.9607
		taurocholenate sulfate				1	0.5807	0.6089	1.0486
Nucleotide	Purine Metabolism, (Hypo)Xanthine/Inosine containing	inosine 5'-monophosphate (IMP)	C00130	8582	HMDB00175	1	0.3642	0.331	0.9087
		inosine	C00294	6021	HMDB00195	1	1.0585	0.83	0.7841
		hypoxanthine	C00262	790	HMDB00157	1	1.9153	1.8333	0.9572
		xanthine	C00385	1188	HMDB00292	1	1.5251	1.2912	0.8467
		xanthosine	C01762	64959	HMDB00299	1	2.0498	2.9401	1.4343
		2'-deoxyinosine	C05512	65058	HMDB00071	1	3.9054	3.8843	0.9946
		urate	C00366	1175	HMDB00289	1	0.7718	0.862	1.1168
		allantoin	C02350	204	HMDB00462	1	0.4543	0.4228	0.9307
	Purine Metabolism, Adenine containing	adenosine 5'-diphosphate (ADP)	C00008	6022	HMDB01341	1	1.7347	1.3551	0.7812
		adenosine 5'-monophosphate (AMP)	C00020	6083	HMDB00045	1	3.5791	2.2333	0.624
		adenosine 3'-monophosphate (3'-AMP)	C01367	41211	HMDB03540	1	3.8244	5.1778	1.3539
		adenosine 2'-monophosphate (2'-AMP)	C00946	94136	HMDB11617	1	0.4047	0.3506	0.8663
		adenosine 3',5'-cyclic monophosphate (cAMP)	C00575	6076	HMDB00058	1	1.0816	0.9733	0.8999
		adenosine 3',5'-diphosphate	C00054	159296	HMDB00061	1	0.8656	0.8773	1.0135
		adenylosuccinate	C03794	195	HMDB00536	1	1.6145	1.3132	0.8134
		adenosine	C00212	60961	HMDB00050	1	1.2593	1.1961	0.9498
		adenine	C00147	190	HMDB00034	1	2.6963	1.8166	0.6737
		N1-methyladenosine	C02494	27476	HMDB03331	1	1.5195	1.6186	1.0653
		N6-methyladenosine		102175	HMDB04044	1	2.202	2.2861	1.0382
		N6-carbamoylthreonyladenosine		161466	HMDB41623	1	1.4405	1.656	1.1496
		N6-succinyladenosine			HMDB00912	1	2.343	2.1997	0.9389
	Purine Metabolism, Guanine containing	guanosine 5'- monophosphate (5'-GMP)	C00144	6804	HMDB01397	1	1.7347	1.1704	0.6747
		guanosine 3'-monophosphate (3'-GMP)		3522		1	2.9607	3.9843	1.3457
		guanosine	C00387	6802	HMDB00133	1	1.5005	1.4827	0.9881
		guanine	C00242	764	HMDB00132	1	2.6958	3.1105	1.1539
		7-methylguanine	C02242	11361	HMDB00897	1	1.7309	1.7618	1.0178
		N1-methylguanosine		96373	HMDB01563	1	1.943	2.2653	1.1658
		N2-methylguanosine		3035422	HMDB05862	1	2.507	2.9828	1.1898
		N2,N2-dimethylguanosine		92919	HMDB04824	1	2.309	2.718	1.1772
		2'-deoxyguanosine	C00330	187790	HMDB00085	1	4.2977	4.6975	1.093
		guanosine 2'-monophosphate (2'-GMP)*		444571		1	0.2341	0.1486	0.6349
	Pyrimidine Metabolism, Orotate containing	orotate	C00295	967	HMDB00226	1	5.2647	3.3934	0.6446
		orotidine	C01103	92751	HMDB00788	1	2.1819	2.5904	1.1872
	Pyrimidine Metabolism, Uracil containing	uridine 5'-triphosphate (UTP)	C00075	6133	HMDB00285	1	0.6961	0.566	0.8132
		uridine 5'-diphosphate (UDP)	C00015	6031	HMDB00295	1	1.0793	1.1542	1.0694
		uridine 5'-monophosphate (UMP)	C00105	6030	HMDB00288	1	2.5302	1.7349	0.6857
		uridine 3'-monophosphate (3'-UMP)	C01368	101543		1	3.8067	3.7469	0.9843
		uridine-2',3'-cyclic monophosphate	C02355	439715	HMDB11640	1	1.297	1.8744	1.4452
		uridine	C00299	6029	HMDB00296	1	0.8271	0.7756	0.9378
		uracil	C00106	1174	HMDB00300	1	2.7837	2.8627	1.0284
		pseudouridine	C02067	15047	HMDB00767	1	1.1721	1.2787	1.0909
		5-methyluridine (ribothymidine)		445408	HMDB00884	1	1.2138	1.2424	1.0235
		5,6-dihydrouracil	C00429	649	HMDB00076	1	2.9841	3.0497	1.022
		beta-alanine	C00099	239	HMDB00056	1	1.8066	1.8211	1.008
		N-acetyl-beta-alanine	C01073	76406		1	1.6884	1.4193	0.8406
		uridine 2'-monophosphate (2'-UMP)*				1	1.0188	0.9527	0.9351
	Pyrimidine Metabolism, Cytidine containing	cytidine 5'-monophosphate (5'-CMP)	C00055	6131	HMDB00095	1	1.2547	1.2121	0.966
		cytidine 3'-monophosphate (3'-CMP)	C05822	66535		1	1.2811	1.3719	1.0709
		cytidine 2',3'-cyclic monophosphate	C02354	417654	HMDB11691	1	0.5093	0.6636	1.303
		cytidine	C00475	6175	HMDB00089	1	0.6312	0.8497	1.3463
		N4-acetylcytidine		107461	HMDB05923	1	1.5471	1.7479	1.1297
		5-methyl-2'-deoxycytidine	C03592	440055	HMDB02224	1	1.6436	1.6454	1.0011
	Pyrimidine Metabolism, Thymine containing	thymine	C00178	1135	HMDB00262	1	4.4821	4.6498	1.0374
		5,6-dihydrothymine	C00906	93556	HMDB00079	1	3.6827	4.054	1.1008
		3-aminoisobutyrate	C05145	64956	HMDB03911	1	1.8797	1.3189	0.7017
	Purine and Pyrimidine Metabolism	methylphosphate		13130	HMDB61711	1	2.0095	2.3855	1.1871
Cofactors and Vitamins	Nicotinate and Nicotinamide Metabolism	quinolinate	C03722	1066	HMDB00232	1	9.9873	12.2225	1.2238
		nicotinate	C00253	938	HMDB01488	1	1.4793	1.209	0.8173
		nicotinamide	C00153	936	HMDB01406	1	1.4593	1.3764	0.9432
		nicotinamide adenine dinucleotide (NAD+)	C00003	5893	HMDB00902	1	0.7281	0.5288	0.7263
		nicotinamide adenine dinucleotide reduced (NADH)	C00004	439153	HMDB01487	1	0.9474	0.5534	0.5841
		1-methylnicotinamide	C02918	10129985	HMDB00699	1	4.0072	4.2236	1.054
		N'-Methylnicotinamide		64950	HMDB03152	1	2.7843	1.8096	0.6499
		trigonelline (N'-methylnicotinate)	C01004	5570	HMDB00875	1	1.9035	2.2354	1.1744
		N1-Methyl-2-pyridone-5-carboxamide	C05842	69698	HMDB04193	1	0.7265	0.6792	0.9349
		adenosine 5'-diphosphoribose (ADP-ribose)	C00301	192	HMDB01178	1	0.6968	0.3939	0.5653
	Riboflavin Metabolism	riboflavin (Vitamin B2)	C00255	493570	HMDB00244	1	1.8525	2.0319	1.0968
		flavin adenine dinucleotide (FAD)	C00016	643975	HMDB01248	1	1.6335	1.4778	0.9047
		flavin mononucleotide (FMN)	C00061	710	HMDB01520	1	1.2931	1.0793	0.8347
	Pantothenate and CoA Metabolism	pantothenate	C00864	6613	HMDB00210	1	1.1285	0.9535	0.845
		phosphopantetheine	C01134	987	HMDB01416	1	0.8716	0.9089	1.0428
		3'-dephosphocoenzyme A	C00882	444485	HMDB01373	1	2.159	1.2623	0.5847
		coenzyme A	C00010	317	HMDB01423	1	2.0868	1.0588	0.5074
	Ascorbate and Aldarate Metabolism	ascorbate (Vitamin C)	C00072		HMDB00044	1	25.8626	11.9262	0.4611
		dehydroascorbate	C05422	835	HMDB01264	1	1.2443	1.6558	1.3307
		threonate	C01620	151152	HMDB00943	1	2.4138	2.6399	1.0937
		oxalate (ethanedioate)	C00209	971	HMDB02329	1	0.7675	1.1517	1.5006
		gulonic acid*		9794176		1	7.0176	7.1727	1.0221
	Tocopherol Metabolism	alpha-tocopherol	C02477	14985	HMDB01893	1	1.3685	1.7093	1.249
	Tetrahydrobiopterin Metabolism	biopterin	C06313	445040	HMDB00468	1	1.7883	1.5312	0.8562
		dihydrobiopterin	C00268	1879	HMDB00038	1	4.0997	3.4413	0.8394
	Pterin Metabolism	pterin	C00715	73000	HMDB00802	1	1.3767	1.8915	1.374
	Hemoglobin and Porphyrin Metabolism	heme	C00032	26945	HMDB03178	1	0.3712	0.3831	1.0323
		bilirubin (Z,Z)	C00486	5280352	HMDB00054	1	1.2217	1.673	1.3693
		biliverdin	C00500	5353439	HMDB01008	1	0.5815	1.0647	1.8311
	Thiamine Metabolism	thiamin diphosphate	C00068	1132	HMDB01372	1	3.3381	3.7247	1.1158
	Vitamin B6 Metabolism	pyridoxal	C00250	1050	HMDB01545	1	2.2197	2.7946	1.259
		pyridoxate	C00847	6723	HMDB00017	1	0.5063	0.5834	1.1523
Xenobiotics	Benzoate Metabolism	hippurate	C01586	464	HMDB00714	1	0.7245	1.0405	1.4362
		benzoate	C00180	243	HMDB01870	1	0.9065	0.8405	0.9272
		4-hydroxybenzoate	C00156	135	HMDB00500	1	0.4758	0.7879	1.6558
		catechol sulfate	C00090	3083879	HMDB59724	1	0.537	0.7144	1.3304
		O-methylcatechol sulfate		22473		1	0.3826	0.4918	1.2853
		4-methylcatechol sulfate				1	0.4804	0.7072	1.4719
		4-ethylphenylsulfate	C13637			1	0.3907	0.5108	1.3072
		4-vinylphenol sulfate	C05627	6426766	HMDB04072	1	0.2108	0.3837	1.8201
	Xanthine Metabolism	caffeine	C07481	2519	HMDB01847	1	1	1	1
		paraxanthine	C13747	4687	HMDB01860	1	1	1	1
		theobromine	C07480	5429	HMDB02825	1	1	1	1
		theophylline	C07130	2153	HMDB01889	1	1	1	1
		1-methylurate	C16359	69726	HMDB03099	1	1	1	1
		1,3-dimethylurate		70346	HMDB01857	1	1	1	1
		1,7-dimethylurate	C16356	91611	HMDB11103	1	1	1	1
		1,3,7-trimethylurate	C16361	79437	HMDB02123	1	1	1	1
		3-methylxanthine	C16357	70639	HMDB01886	1	1	1	1
	Tobacco Metabolite	cotinine		854019	HMDB01046	1	0.8121	0.621	0.7647
		hydroxycotinine		10219774	HMDB01390	1	0.9909	0.9533	0.962
	Food Component/Plant	2-piperidinone		12665		1	1	1	1
		3-hydroxyindolin-2-one	C11130	6097		1	1.0651	1.0237	0.9611
		gluconate	C00257	10690	HMDB00625	1	2.825	3.4342	1.2156
		ergothioneine	C05570	3032311	HMDB03045	1	2.5962	2.5356	0.9767
		erythritol	C00503	222285	HMDB02994	1	1.7488	1.6076	0.9192
		homostachydrine*	C08283	441447	HMDB33433	1	1.4672	1.4946	1.0187
		quinate	C00296	6508	HMDB03072	1	0.8708	0.7985	0.917
		stachydrine	C10172	115244	HMDB04827	1	1.0561	1.0713	1.0144
		methyl glucopyranoside (alpha + beta)				1	2.1973	1.7309	0.7878
		pyrraline				1	1.2534	1.2777	1.0194
	Bacterial/Fungal	tartronate (hydroxymalonate)	C02287	45	HMDB35227	1	0.9508	1.6388	1.7236
	Drug	2-hydroxyacetaminophen sulfate*				1	0.9657	0.9657	1
		2-methoxyacetaminophen sulfate*				1	0.9563	0.9563	1
		4-acetaminophen sulfate	C06804	83939	HMDB59911	1	0.9432	0.5973	0.6333
		4-acetamidophenol	C06804	1983	HMDB01859	1	1.0121	0.515	0.5088
		4-acetamidophenylglucuronide		83944	HMDB10316	1	0.9524	0.9524	1
		6-oxopiperidine-2-carboxylic acid		3014237		1	0.7806	0.6963	0.892
		desmethylnaproxen sulfate		184679		1	0.9815	0.9787	0.9972
		diphenhydramine	C06960	3100	HMDB01927	1	1.5076	1.3554	0.899
		lidocaine	D00358	3676	HMDB14426	1	0.4987	0.8067	1.6177
		naproxen	C01517	156391	HMDB01923	1	1.0805	0.9087	0.841
		N-ethylglycinexylidide	C16561	24415	HMDB60656	1	1.3319	1.2849	0.9647
		pantoprazole	C11806	4679	HMDB05017	1	0.8668	0.9089	1.0485
		pseudoephedrine	C02765	7028	HMDB01943	1	0.8248	0.5454	0.6612
		salicylate	C00805	338	HMDB01895	1	0.6197	0.4633	0.7475
		rocuronium		9849870		1	0.7939	0.6757	0.8512
	Chemical	1,2-propanediol	C00583	1030	HMDB01881	1	0.9321	0.974	1.045
		sulfate*	C00059	1118	HMDB01448	1	0.8489	0.974	1.1474
		O-sulfo-L-tyrosine		514186		1	1.6478	1.5581	0.9456
		2-aminophenol sulfate		181670	HMDB61116	1	0.7805	0.8702	1.115
		dimethyl sulfone	C11142	6213	HMDB04983	1	1.0323	1.2512	1.2121
		ectoine	C06231	126041		1	1.0707	1.0433	0.9744
		N-methylpipecolate		11862129;11286529		1	1.1213	1.0744	0.9582
		MOPS		70807;2723950		1	0.3034	0.4518	1.489
